# Supplementary material
Source: publisher site journal article supplement (https://www.spandidos-publications.com/5528/downloadSupplementary)
Supplement: Supplementary file 1 [file downloadSupplementary]

## Sheet: Sheet1
Table SV. List of protein-protein interactions
#node1	node2	node1_string_id	node2_string_id	neighborhood_on_chromosome	gene_fusion	phylogenetic_cooccurrence	homology	coexpression	experimentally_determined_interaction	database_annotated	automated_textmining	combined_score
AACS	PHGDH	9606.ENSP00000324842	9606.ENSP00000358417	0	0	0	0	0	0	0	0.405	0.405
ACO1	NARFL	9606.ENSP00000309477	9606.ENSP00000251588	0	0	0	0	0	0	0	0.548	0.548
ACO1	OCRL	9606.ENSP00000309477	9606.ENSP00000360154	0	0	0	0	0.062	0	0	0.563	0.572
ACO1	MDH1	9606.ENSP00000309477	9606.ENSP00000438144	0.07	0	0	0	0.131	0.22	0	0.668	0.763
AIM1	SIRT3	9606.ENSP00000358062	9606.ENSP00000372191	0	0	0	0	0	0	0	0.556	0.556
AJUBA	YAP1	9606.ENSP00000262713	9606.ENSP00000478927	0	0	0	0	0.213	0.085	0	0.453	0.572
AJUBA	H2AFX	9606.ENSP00000262713	9606.ENSP00000434024	0	0	0	0	0.062	0	0.6	0	0.608
AJUBA	SUZ12	9606.ENSP00000262713	9606.ENSP00000316578	0	0	0	0	0	0	0.6	0.109	0.628
AK2	CKB	9606.ENSP00000346921	9606.ENSP00000299198	0	0	0	0	0.085	0.102	0	0.344	0.414
AK2	MDH1	9606.ENSP00000346921	9606.ENSP00000438144	0	0	0	0	0.212	0	0	0.428	0.53
AK2	TAF9	9606.ENSP00000346921	9606.ENSP00000370201	0	0	0	0	0.063	0	0	0.751	0.757
ALDH1L2	PHGDH	9606.ENSP00000258494	9606.ENSP00000358417	0.045	0	0	0	0	0.162	0	0.367	0.45
ALDH1L2	KLHDC4	9606.ENSP00000258494	9606.ENSP00000270583	0	0	0	0	0	0	0	0.453	0.453
ALDH5A1	SGPL1	9606.ENSP00000314649	9606.ENSP00000362298	0	0	0	0	0.088	0.104	0	0.611	0.654
ALDH5A1	MDH1	9606.ENSP00000314649	9606.ENSP00000438144	0.044	0	0	0	0.067	0.058	0.8	0.218	0.844
AMOTL2	YWHAE	9606.ENSP00000424765	9606.ENSP00000264335	0	0	0	0	0.063	0	0.65	0.101	0.679
AMOTL2	ITCH	9606.ENSP00000424765	9606.ENSP00000480499	0	0	0	0	0	0.057	0	0.391	0.401
AMOTL2	YAP1	9606.ENSP00000424765	9606.ENSP00000478927	0	0	0	0	0.349	0.874	0.6	0.655	0.987
APOBEC3C	NDUFA10	9606.ENSP00000355340	9606.ENSP00000252711	0	0	0	0	0.184	0.533	0	0.07	0.614
APOBEC3C	UQCRB	9606.ENSP00000355340	9606.ENSP00000430494	0	0	0	0	0.253	0.349	0	0.193	0.573
ARFGAP3	ARHGEF7	9606.ENSP00000263245	9606.ENSP00000364893	0	0	0	0	0.048	0.166	0	0.623	0.675
ARHGEF7	GNAQ	9606.ENSP00000364893	9606.ENSP00000286548	0	0	0	0	0	0	0	0.443	0.443
ARHGEF7	PTK2	9606.ENSP00000364893	9606.ENSP00000341189	0	0	0	0	0.091	0	0.9	0.407	0.941
ARHGEF7	EXOC8	9606.ENSP00000364893	9606.ENSP00000355605	0	0	0	0	0.073	0	0	0.443	0.462
ARHGEF7	ERBB2IP	9606.ENSP00000364893	9606.ENSP00000426632	0	0	0	0	0.06	0.056	0	0.441	0.461
ARHGEF7	SH3KBP1	9606.ENSP00000364893	9606.ENSP00000380921	0	0	0	0.556	0	0	0.6	0.325	0.652
ARHGEF7	ITCH	9606.ENSP00000364893	9606.ENSP00000480499	0	0	0	0	0	0.881	0	0.702	0.963
ARHGEF7	GIT1	9606.ENSP00000364893	9606.ENSP00000378338	0	0	0	0	0.137	0.924	0.9	0.992	0.999
ASB3	CKB	9606.ENSP00000313756	9606.ENSP00000299198	0	0	0	0	0	0.06	0	0.529	0.539
ATG2A	VMP1	9606.ENSP00000366475	9606.ENSP00000262291	0	0	0	0	0.046	0	0	0.51	0.513
ATG2A	PIKFYVE	9606.ENSP00000366475	9606.ENSP00000264380	0	0	0	0	0.237	0	0	0.401	0.523
ATG2A	C21orf59	9606.ENSP00000366475	9606.ENSP00000290155	0	0	0	0	0	0	0	0.607	0.607
ATG2A	RFTN1	9606.ENSP00000366475	9606.ENSP00000334153	0	0	0	0	0	0.13	0	0.464	0.514
ATG2A	ERBB2IP	9606.ENSP00000366475	9606.ENSP00000426632	0	0	0	0	0.064	0	0	0.44	0.453
ATG2A	EHD1	9606.ENSP00000366475	9606.ENSP00000479153	0	0	0	0	0.064	0	0	0.656	0.665
ATPIF1	NDUFA10	9606.ENSP00000335203	9606.ENSP00000252711	0	0	0	0	0.079	0	0	0.501	0.521
ATPIF1	UXS1	9606.ENSP00000335203	9606.ENSP00000283148	0	0	0	0	0	0	0	0.559	0.559
BAP1	GNAQ	9606.ENSP00000417132	9606.ENSP00000286548	0	0	0	0	0.054	0	0	0.56	0.565
BAP1	SUZ12	9606.ENSP00000417132	9606.ENSP00000316578	0	0	0	0	0.062	0	0.9	0.407	0.939
BAP1	FOXK2	9606.ENSP00000417132	9606.ENSP00000335677	0	0	0	0	0.062	0.874	0.6	0.652	0.981
BCKDHB	TXNRD2	9606.ENSP00000318351	9606.ENSP00000383365	0.111	0	0	0	0.231	0.337	0	0.189	0.583
BCKDHB	IVD	9606.ENSP00000318351	9606.ENSP00000418397	0	0	0	0	0.294	0.058	0.9	0.705	0.977
BRCA2	USP11	9606.ENSP00000369497	9606.ENSP00000218348	0	0	0	0	0	0.486	0	0.909	0.951
BRCA2	LIG1	9606.ENSP00000369497	9606.ENSP00000263274	0	0	0	0	0.178	0	0	0.469	0.544
BRCA2	PMS2	9606.ENSP00000369497	9606.ENSP00000265849	0	0	0	0	0.123	0.131	0	0.771	0.81
BRCA2	WDR48	9606.ENSP00000369497	9606.ENSP00000307491	0	0	0	0	0.086	0	0	0.456	0.481
BRCA2	RNF8	9606.ENSP00000369497	9606.ENSP00000362578	0	0	0	0	0	0	0	0.583	0.583
BRCA2	POLE3	9606.ENSP00000369497	9606.ENSP00000363286	0	0	0	0	0.061	0	0.9	0.165	0.914
BRCA2	SPOP	9606.ENSP00000369497	9606.ENSP00000377001	0	0	0	0	0	0	0	0.456	0.456
BRCA2	H2AFX	9606.ENSP00000369497	9606.ENSP00000434024	0	0	0	0	0.077	0.486	0.6	0.619	0.918
BTF3L4	MRPS12	9606.ENSP00000360664	9606.ENSP00000384952	0	0	0	0	0.392	0.238	0	0	0.516
BTF3L4	EEF1B2	9606.ENSP00000360664	9606.ENSP00000376056	0	0	0	0	0.204	0.393	0	0.151	0.554
C1orf106	DCTN5	9606.ENSP00000392105	9606.ENSP00000300087	0	0	0	0	0	0.478	0	0	0.478
C21orf59	PTGES2	9606.ENSP00000290155	9606.ENSP00000345341	0	0	0	0	0	0	0	0.426	0.426
C21orf59	RFTN1	9606.ENSP00000290155	9606.ENSP00000334153	0	0	0	0	0	0	0	0.586	0.586
CALU	PDIA3	9606.ENSP00000438248	9606.ENSP00000300289	0	0	0	0	0.121	0.056	0	0.482	0.534
CALU	EEF1B2	9606.ENSP00000438248	9606.ENSP00000376056	0	0	0	0	0.103	0	0	0.374	0.414
CASC3	SNRPB2	9606.ENSP00000264645	9606.ENSP00000246071	0	0	0	0	0	0.8	0	0	0.8
CASC3	NUP35	9606.ENSP00000264645	9606.ENSP00000295119	0	0	0	0	0	0	0.6	0	0.6
CASC3	NUP188	9606.ENSP00000264645	9606.ENSP00000361658	0	0	0	0	0.055	0	0.6	0	0.605
CASC3	NUPL1	9606.ENSP00000264645	9606.ENSP00000371155	0	0	0	0	0.062	0	0.6	0	0.608
CCT6A	USP11	9606.ENSP00000275603	9606.ENSP00000218348	0	0	0	0	0.052	0	0.6	0	0.604
CCT6A	PIKFYVE	9606.ENSP00000275603	9606.ENSP00000264380	0	0	0	0	0.049	0.058	0	0.582	0.592
CCT6A	RPL30	9606.ENSP00000275603	9606.ENSP00000428085	0	0	0	0	0.326	0	0	0.177	0.422
CCT6A	EEF1B2	9606.ENSP00000275603	9606.ENSP00000376056	0	0	0	0	0.553	0	0	0.062	0.563
CCT6A	FBXO4	9606.ENSP00000275603	9606.ENSP00000281623	0	0	0	0	0	0	0.6	0	0.6
CCT6A	HSPB8	9606.ENSP00000275603	9606.ENSP00000281938	0	0	0	0	0	0.058	0.72	0.101	0.742
CCT6A	CCT6B	9606.ENSP00000275603	9606.ENSP00000327191	0	0	0.447	0.983	0	0.68	0.9	0.93	0.967
CCT6B	USP11	9606.ENSP00000327191	9606.ENSP00000218348	0	0	0	0	0.049	0	0.6	0	0.603
CCT6B	FBXO4	9606.ENSP00000327191	9606.ENSP00000281623	0	0	0	0	0	0	0.6	0	0.6
CCT6B	HSPB8	9606.ENSP00000327191	9606.ENSP00000281938	0	0	0	0	0	0.058	0.54	0.145	0.597
CD3EAP	H2AFX	9606.ENSP00000465099	9606.ENSP00000434024	0	0	0	0	0	0	0.9	0	0.9
CDKN1C	TAF9	9606.ENSP00000413720	9606.ENSP00000370201	0	0	0	0	0	0	0	0.642	0.642
CENPH	KIF18B	9606.ENSP00000283006	9606.ENSP00000465992	0	0	0	0	0.295	0.184	0	0	0.4
CENPH	NUSAP1	9606.ENSP00000283006	9606.ENSP00000453403	0	0	0	0	0.534	0	0	0	0.534
CENPH	H2AFX	9606.ENSP00000283006	9606.ENSP00000434024	0	0	0	0	0.135	0	0.6	0	0.639
CENPH	SKA3	9606.ENSP00000283006	9606.ENSP00000319417	0	0	0	0	0.65	0	0	0.284	0.738
CKB	PDIA3	9606.ENSP00000299198	9606.ENSP00000300289	0	0	0	0	0.062	0	0	0.4	0.413
CKB	MDH1	9606.ENSP00000299198	9606.ENSP00000438144	0	0	0	0	0.085	0.058	0	0.395	0.433
CKB	PHGDH	9606.ENSP00000299198	9606.ENSP00000358417	0	0	0	0	0.07	0.4	0	0.074	0.438
CKB	PGAM1	9606.ENSP00000299198	9606.ENSP00000359991	0	0	0	0	0.146	0.238	0	0.227	0.453
CKB	GIG25	9606.ENSP00000299198	9606.ENSP00000376793	0	0	0	0	0.062	0	0	0.486	0.497
CLU	PDIA3	9606.ENSP00000315130	9606.ENSP00000300289	0	0	0	0	0	0.433	0	0.162	0.504
CLU	GIG25	9606.ENSP00000315130	9606.ENSP00000376793	0	0	0	0	0	0	0	0.577	0.577
COG5	RFK	9606.ENSP00000297135	9606.ENSP00000365926	0	0	0	0	0	0	0	0.489	0.489
COG5	VPS53	9606.ENSP00000297135	9606.ENSP00000401435	0	0	0	0	0.074	0	0.6	0.627	0.85
COMT	STX2	9606.ENSP00000354511	9606.ENSP00000376178	0	0	0	0	0	0	0	0.408	0.408
COMT	STT3A	9606.ENSP00000354511	9606.ENSP00000376472	0.073	0	0	0	0	0	0	0.424	0.443
COMT	TXNRD2	9606.ENSP00000354511	9606.ENSP00000383365	0	0	0	0	0.065	0	0	0.64	0.649
COPS3	NIF3L1	9606.ENSP00000268717	9606.ENSP00000386394	0	0	0	0	0.12	0	0	0.386	0.436
COPS3	ERBB2IP	9606.ENSP00000268717	9606.ENSP00000426632	0	0	0	0	0	0	0	0.662	0.662
COPS3	PLCG2	9606.ENSP00000268717	9606.ENSP00000482457	0	0	0	0	0	0.784	0	0	0.784
CPLX1	STX2	9606.ENSP00000305613	9606.ENSP00000376178	0	0	0	0	0.062	0.178	0.54	0.284	0.712
CTSL	CTSZ	9606.ENSP00000345344	9606.ENSP00000217131	0	0	0.274	0.656	0.174	0	0	0.82	0.455
CTSL	IFI30	9606.ENSP00000345344	9606.ENSP00000384886	0	0	0	0	0.108	0	0	0.393	0.436
CTSZ	RTFDC1	9606.ENSP00000217131	9606.ENSP00000023939	0	0	0	0	0.049	0	0	0.696	0.699
CTSZ	IFI30	9606.ENSP00000217131	9606.ENSP00000384886	0	0	0	0	0.358	0	0	0.287	0.523
CTSZ	SLMO2	9606.ENSP00000217131	9606.ENSP00000348206	0	0	0	0	0.062	0	0	0.704	0.71
CWF19L1	DGCR14	9606.ENSP00000326411	9606.ENSP00000252137	0	0	0	0	0	0	0	0.681	0.681
CWF19L1	SNAPC3	9606.ENSP00000326411	9606.ENSP00000370200	0	0	0	0	0.062	0	0	0.403	0.416
DBNL	PLS1	9606.ENSP00000417653	9606.ENSP00000336831	0	0	0	0	0.085	0.567	0	0.478	0.775
DCTN5	SENP3	9606.ENSP00000300087	9606.ENSP00000314029	0	0	0	0	0	0.562	0	0	0.562
DDI2	RTFDC1	9606.ENSP00000417748	9606.ENSP00000023939	0	0	0	0	0.076	0	0	0.556	0.573
DDX18	EIF5	9606.ENSP00000263239	9606.ENSP00000216554	0	0	0	0	0.181	0.059	0	0.299	0.412
DDX18	VRK1	9606.ENSP00000263239	9606.ENSP00000216639	0	0	0	0	0.155	0.296	0	0.169	0.463
DDX18	FKBP15	9606.ENSP00000263239	9606.ENSP00000238256	0	0	0	0	0.756	0.173	0	0.061	0.793
DDX18	PRPF6	9606.ENSP00000263239	9606.ENSP00000266079	0	0	0	0	0.071	0.376	0	0.165	0.475
DDX18	RPL30	9606.ENSP00000263239	9606.ENSP00000428085	0	0	0	0	0.093	0.559	0	0.075	0.597
DDX18	KIAA0020	9606.ENSP00000263239	9606.ENSP00000380982	0	0	0	0	0.9	0.41	0	0.441	0.964
DGCR14	SUZ12	9606.ENSP00000252137	9606.ENSP00000316578	0	0	0	0	0	0	0	0.453	0.453
DNAJA3	SIRT3	9606.ENSP00000262375	9606.ENSP00000372191	0	0	0	0	0.045	0.058	0	0.442	0.454
DNAJA3	DNAJC15	9606.ENSP00000262375	9606.ENSP00000368523	0.043	0	0	0	0.08	0.077	0	0.543	0.579
EEF1B2	EIF5	9606.ENSP00000376056	9606.ENSP00000216554	0	0	0	0	0.306	0	0	0.415	0.577
EEF1B2	VRK1	9606.ENSP00000376056	9606.ENSP00000216639	0	0	0	0	0.062	0	0	0.654	0.661
EEF1B2	MRPS14	9606.ENSP00000376056	9606.ENSP00000420714	0	0	0	0	0.286	0.253	0	0	0.444
EEF1B2	MRPS12	9606.ENSP00000376056	9606.ENSP00000384952	0	0	0	0	0.366	0.346	0	0	0.568
EEF1B2	RPL30	9606.ENSP00000376056	9606.ENSP00000428085	0	0	0	0	0.96	0.35	0	0.19	0.977
EHBP1	EHD1	9606.ENSP00000263991	9606.ENSP00000479153	0	0	0	0	0.079	0.213	0	0.643	0.718
EHD1	PDCD6IP	9606.ENSP00000479153	9606.ENSP00000411825	0	0	0	0	0.062	0.345	0	0.365	0.576
EIF5	LARP4	9606.ENSP00000216554	9606.ENSP00000381490	0	0	0	0	0.088	0	0	0.418	0.447
EIF5	GCN1L1	9606.ENSP00000216554	9606.ENSP00000300648	0	0	0	0	0.255	0	0	0.317	0.47
ERBB2IP	PARD3	9606.ENSP00000426632	9606.ENSP00000363921	0	0	0	0	0	0.126	0	0.498	0.543
EXOC6B	EXOC8	9606.ENSP00000272427	9606.ENSP00000355605	0	0	0	0	0.102	0.97	0.54	0.71	0.995
EXOC8	VPS53	9606.ENSP00000355605	9606.ENSP00000401435	0	0	0	0	0.1	0	0	0.636	0.658
FAM102B	TAF13	9606.ENSP00000359052	9606.ENSP00000355051	0	0	0	0	0	0	0	0.434	0.434
FAM107B	HOMER3	9606.ENSP00000181796	9606.ENSP00000439937	0	0	0	0	0	0	0	0.676	0.676
FBXO4	YWHAE	9606.ENSP00000281623	9606.ENSP00000264335	0	0	0	0	0	0.345	0	0.477	0.643
FKBP15	KIAA0020	9606.ENSP00000238256	9606.ENSP00000380982	0	0	0	0	0.849	0.108	0	0.067	0.863
FOXK2	TBL1X	9606.ENSP00000335677	9606.ENSP00000217964	0	0	0	0	0.066	0.405	0	0.11	0.463
FOXK2	MRPS14	9606.ENSP00000335677	9606.ENSP00000420714	0	0	0	0	0.052	0.059	0	0.392	0.41
FOXK2	TBCD	9606.ENSP00000335677	9606.ENSP00000347719	0	0	0	0	0.078	0	0	0.493	0.513
GALK1	HOXA11	9606.ENSP00000465930	9606.ENSP00000006015	0	0	0	0	0	0	0	0.41	0.41
GCN1L1	HARS2	9606.ENSP00000300648	9606.ENSP00000230771	0	0	0	0	0.107	0.211	0	0.665	0.743
GCN1L1	RPL30	9606.ENSP00000300648	9606.ENSP00000428085	0	0	0	0	0.14	0.349	0	0	0.416
GCN1L1	SAFB	9606.ENSP00000300648	9606.ENSP00000467423	0	0	0	0	0.049	0.271	0	0.285	0.461
GCN1L1	KIAA0020	9606.ENSP00000300648	9606.ENSP00000380982	0	0	0	0	0.498	0.07	0	0.147	0.567
GIGYF2	HTRA2	9606.ENSP00000387170	9606.ENSP00000258080	0	0	0	0	0	0	0	0.661	0.661
GIT1	PTK2	9606.ENSP00000378338	9606.ENSP00000341189	0	0	0	0	0.062	0.681	0	0.784	0.929
GNAQ	RGS2	9606.ENSP00000286548	9606.ENSP00000235382	0	0	0	0	0.066	0.661	0.6	0.98	0.997
GNAQ	ITPR2	9606.ENSP00000286548	9606.ENSP00000370744	0	0	0	0	0	0.212	0	0.498	0.587
GNAQ	PLCG2	9606.ENSP00000286548	9606.ENSP00000482457	0	0	0	0	0	0.118	0.8	0.379	0.881
GPR124	SORBS3	9606.ENSP00000406367	9606.ENSP00000240123	0	0	0	0	0.062	0	0	0.619	0.627
GPSM2	PARD3	9606.ENSP00000385510	9606.ENSP00000363921	0	0	0	0	0.062	0.06	0	0.74	0.751
GSK3A	YWHAE	9606.ENSP00000222330	9606.ENSP00000264335	0	0	0	0	0.061	0.369	0	0.138	0.445
GSK3A	GYS1	9606.ENSP00000222330	9606.ENSP00000317904	0	0	0	0	0.108	0.106	0	0.411	0.489
GYS1	SLC2A3	9606.ENSP00000317904	9606.ENSP00000075120	0	0	0	0	0.084	0	0	0.382	0.41
H2AFX	VRK1	9606.ENSP00000434024	9606.ENSP00000216639	0	0	0	0	0.086	0.27	0	0.257	0.461
H2AFX	USP11	9606.ENSP00000434024	9606.ENSP00000218348	0	0	0	0	0.062	0.502	0	0.452	0.722
H2AFX	LIG1	9606.ENSP00000434024	9606.ENSP00000263274	0	0	0	0	0.174	0.066	0	0.37	0.472
H2AFX	SUZ12	9606.ENSP00000434024	9606.ENSP00000316578	0	0	0	0	0	0.27	0.6	0.361	0.797
H2AFX	RNF40	9606.ENSP00000434024	9606.ENSP00000325677	0	0	0	0	0.088	0.164	0	0.344	0.456
H2AFX	SYNE2	9606.ENSP00000434024	9606.ENSP00000350719	0	0	0	0	0	0.056	0.6	0.062	0.614
H2AFX	RNF8	9606.ENSP00000434024	9606.ENSP00000362578	0	0	0	0	0	0.832	0.9	0.698	0.994
HARS2	PRTN3	9606.ENSP00000230771	9606.ENSP00000234347	0	0	0	0	0	0	0	0.681	0.681
HAUS3	PMS2	9606.ENSP00000243706	9606.ENSP00000265849	0	0	0	0	0	0	0	0.489	0.489
HCCS	NDUFA10	9606.ENSP00000326579	9606.ENSP00000252711	0	0	0	0	0.094	0	0	0.436	0.467
HOXA11	HOXA13	9606.ENSP00000006015	9606.ENSP00000222753	0	0	0	0.647	0.531	0	0	0.872	0.674
HSPB11	HSPB8	9606.ENSP00000194214	9606.ENSP00000281938	0	0	0	0	0	0	0	0.575	0.575
HTRA2	MDH1	9606.ENSP00000258080	9606.ENSP00000438144	0.048	0	0	0	0.288	0.244	0	0.101	0.478
HTRA2	PDCD6IP	9606.ENSP00000258080	9606.ENSP00000411825	0	0	0	0	0.083	0.68	0	0	0.694
INTS10	SNAPC1	9606.ENSP00000381064	9606.ENSP00000216294	0	0	0	0	0	0	0	0.522	0.522
INTS10	SNAPC2	9606.ENSP00000381064	9606.ENSP00000221573	0	0	0	0	0	0	0	0.556	0.556
INTS10	PDE6D	9606.ENSP00000381064	9606.ENSP00000287600	0	0	0	0	0.53	0	0	0	0.53
INTS10	SPRYD7	9606.ENSP00000381064	9606.ENSP00000354774	0	0	0	0	0	0	0	0.436	0.436
INTS10	ZC3H8	9606.ENSP00000381064	9606.ENSP00000386488	0	0	0	0	0.062	0	0.6	0.393	0.752
INTS10	INTS4	9606.ENSP00000381064	9606.ENSP00000434466	0	0	0	0	0.144	0.424	0.8	0.841	0.982
INTS4	TBCD	9606.ENSP00000434466	9606.ENSP00000347719	0	0	0	0	0.079	0	0	0.427	0.45
INTS4	ZC3H8	9606.ENSP00000434466	9606.ENSP00000386488	0	0	0	0	0.062	0	0.6	0.396	0.753
INTS4	SUPT5H	9606.ENSP00000434466	9606.ENSP00000470252	0	0	0	0	0.117	0.274	0	0.225	0.46
ITCH	WDR48	9606.ENSP00000480499	9606.ENSP00000307491	0	0	0	0	0.083	0.308	0	0.174	0.43
ITCH	SNX18	9606.ENSP00000480499	9606.ENSP00000317332	0	0	0	0	0.076	0.373	0	0.066	0.412
ITCH	LARP4	9606.ENSP00000480499	9606.ENSP00000381490	0	0	0	0	0.064	0.344	0	0.296	0.53
ITCH	PDCD6IP	9606.ENSP00000480499	9606.ENSP00000411825	0	0	0	0	0.063	0.4	0	0.238	0.535
ITCH	YAP1	9606.ENSP00000480499	9606.ENSP00000478927	0	0	0	0.569	0	0.317	0.9	0.38	0.939
ITPR2	SH3KBP1	9606.ENSP00000370744	9606.ENSP00000380921	0	0	0	0	0	0	0.65	0.048	0.652
ITPR2	PLCG2	9606.ENSP00000370744	9606.ENSP00000482457	0	0	0	0	0.079	0.132	0.8	0.494	0.908
KIAA0020	KLHDC4	9606.ENSP00000380982	9606.ENSP00000270583	0	0	0	0	0.64	0	0	0	0.64
KIAA0020	ZNHIT6	9606.ENSP00000380982	9606.ENSP00000359606	0	0	0	0	0.665	0	0	0	0.665
KIAA0020	REXO4	9606.ENSP00000380982	9606.ENSP00000361010	0	0	0	0	0.653	0.272	0	0	0.736
KIAA0020	SUPT5H	9606.ENSP00000380982	9606.ENSP00000470252	0	0	0	0	0.108	0.133	0	0.566	0.636
KIF18B	SKA3	9606.ENSP00000465992	9606.ENSP00000319417	0	0	0	0	0.422	0	0	0.211	0.524
KIF18B	TBCD	9606.ENSP00000465992	9606.ENSP00000347719	0	0	0	0	0.052	0.249	0	0.238	0.41
KIF18B	NUSAP1	9606.ENSP00000465992	9606.ENSP00000453403	0	0	0	0	0.604	0	0	0.39	0.748
KPNA6	SENP3	9606.ENSP00000362728	9606.ENSP00000314029	0	0	0	0	0.079	0.347	0	0.142	0.439
KPNA6	PHGDH	9606.ENSP00000362728	9606.ENSP00000358417	0	0	0	0	0.063	0	0	0.42	0.433
LIG1	NTHL1	9606.ENSP00000263274	9606.ENSP00000219066	0.077	0	0	0	0.089	0	0	0.771	0.791
LIG1	POLE3	9606.ENSP00000263274	9606.ENSP00000363286	0	0	0	0	0.156	0	0.6	0.216	0.712
LIG1	PMS2	9606.ENSP00000263274	9606.ENSP00000265849	0	0	0	0	0.1	0	0	0.771	0.785
MALT1	PLCG2	9606.ENSP00000319279	9606.ENSP00000482457	0	0	0	0	0.062	0	0	0.467	0.478
MDH1	YWHAE	9606.ENSP00000438144	9606.ENSP00000264335	0	0	0	0	0.145	0.152	0	0.287	0.438
MDH1	PDIA3	9606.ENSP00000438144	9606.ENSP00000300289	0.046	0	0	0	0.062	0.129	0	0.339	0.416
MDH1	PURA	9606.ENSP00000438144	9606.ENSP00000332706	0	0	0	0	0	0	0	0.654	0.654
MDH1	PGAM1	9606.ENSP00000438144	9606.ENSP00000359991	0	0	0	0	0.179	0.078	0	0.529	0.612
MDH1	UQCRB	9606.ENSP00000438144	9606.ENSP00000430494	0	0	0	0	0.669	0	0	0.243	0.738
MLXIP	MNT	9606.ENSP00000312834	9606.ENSP00000174618	0	0	0	0	0	0	0	0.657	0.657
MNT	NIF3L1	9606.ENSP00000174618	9606.ENSP00000386394	0	0	0	0	0	0	0	0.648	0.648
MOCS2	PNPO	9606.ENSP00000380157	9606.ENSP00000225573	0	0	0	0	0	0	0	0.461	0.461
MOCS2	PEX14	9606.ENSP00000380157	9606.ENSP00000349016	0	0	0	0	0	0	0	0.518	0.518
MOCS2	POLE3	9606.ENSP00000380157	9606.ENSP00000363286	0	0	0	0	0.063	0.729	0	0.207	0.781
MRPS12	RPL30	9606.ENSP00000384952	9606.ENSP00000428085	0.219	0	0	0	0.644	0.614	0	0.287	0.913
MRPS12	MRPS14	9606.ENSP00000384952	9606.ENSP00000420714	0.167	0	0	0	0.537	0.971	0.9	0.425	0.999
MRPS14	SBDS	9606.ENSP00000420714	9606.ENSP00000246868	0	0	0	0	0.081	0.341	0	0.21	0.48
MRPS14	RPL30	9606.ENSP00000420714	9606.ENSP00000428085	0	0	0	0	0.641	0.619	0	0.142	0.872
MTERF1	PNPO	9606.ENSP00000248643	9606.ENSP00000225573	0	0	0	0	0	0.481	0	0	0.481
NDUFA10	SIRT3	9606.ENSP00000252711	9606.ENSP00000372191	0	0	0	0	0.094	0.274	0	0.175	0.41
NDUFA10	UQCRB	9606.ENSP00000252711	9606.ENSP00000430494	0	0	0	0	0.428	0.985	0	0.341	0.993
NELFCD	SLMO2	9606.ENSP00000473290	9606.ENSP00000348206	0	0	0	0	0.077	0	0	0.563	0.579
NELFCD	SUPT5H	9606.ENSP00000473290	9606.ENSP00000470252	0	0	0	0	0.105	0	0.6	0.811	0.926
NIF3L1	VPS37B	9606.ENSP00000386394	9606.ENSP00000267202	0	0	0	0	0	0.682	0	0	0.682
NTHL1	PMS2	9606.ENSP00000219066	9606.ENSP00000265849	0.07	0	0	0	0.062	0.199	0	0.598	0.681
NUDT12	SIRT3	9606.ENSP00000230792	9606.ENSP00000372191	0	0	0	0	0.063	0.099	0.9	0.098	0.913
NUP188	NUP35	9606.ENSP00000361658	9606.ENSP00000295119	0	0	0	0	0.08	0.196	0.8	0.914	0.985
NUP188	NUPL1	9606.ENSP00000361658	9606.ENSP00000371155	0	0	0	0	0.079	0.88	0.6	0.697	0.985
NUP35	NUPL1	9606.ENSP00000295119	9606.ENSP00000371155	0	0	0	0	0.089	0.479	0.6	0.602	0.914
NUSAP1	SKA3	9606.ENSP00000453403	9606.ENSP00000319417	0	0	0	0	0.614	0	0	0.12	0.646
OCRL	PIKFYVE	9606.ENSP00000360154	9606.ENSP00000264380	0	0	0	0	0.084	0.078	0	0.566	0.601
OCRL	PLCG2	9606.ENSP00000360154	9606.ENSP00000482457	0	0	0	0	0.062	0.063	0.65	0.159	0.706
OTUD5	USP11	9606.ENSP00000156084	9606.ENSP00000218348	0	0	0	0	0.064	0.131	0	0.509	0.566
PARD3	YWHAE	9606.ENSP00000363921	9606.ENSP00000264335	0	0	0	0	0	0.379	0	0.437	0.635
PARD3	YAP1	9606.ENSP00000363921	9606.ENSP00000478927	0	0	0	0	0.184	0.242	0	0.288	0.522
PARD3	RASSF8	9606.ENSP00000363921	9606.ENSP00000384491	0	0	0	0	0.076	0.873	0	0.333	0.915
PDCD6IP	VPS37B	9606.ENSP00000411825	9606.ENSP00000267202	0	0	0	0	0.062	0	0.6	0.352	0.735
PDCD6IP	PHGDH	9606.ENSP00000411825	9606.ENSP00000358417	0	0	0	0	0	0.76	0	0	0.76
PDCD6IP	SH3KBP1	9606.ENSP00000411825	9606.ENSP00000380921	0	0	0	0	0	0.87	0	0.348	0.911
PDCD6IP	YAP1	9606.ENSP00000411825	9606.ENSP00000478927	0	0	0	0	0.062	0.288	0	0.302	0.493
PDIA3	YWHAE	9606.ENSP00000300289	9606.ENSP00000264335	0	0	0	0	0.08	0.219	0	0.309	0.46
PDIA3	PGAM1	9606.ENSP00000300289	9606.ENSP00000359991	0	0	0	0	0.097	0	0	0.39	0.426
PDIA3	STT3A	9606.ENSP00000300289	9606.ENSP00000376472	0	0	0	0	0.277	0.056	0	0.275	0.462
PGAM1	PHGDH	9606.ENSP00000359991	9606.ENSP00000358417	0	0.02	0	0	0.085	0.272	0.9	0.479	0.96
PIKFYVE	VPS53	9606.ENSP00000264380	9606.ENSP00000401435	0	0	0	0	0.087	0	0	0.438	0.465
PIKFYVE	VPS39	9606.ENSP00000264380	9606.ENSP00000335193	0	0	0	0	0.166	0.057	0	0.542	0.608
PIKFYVE	PLCG2	9606.ENSP00000264380	9606.ENSP00000482457	0	0	0	0	0.062	0.116	0.65	0.182	0.73
PLCG2	SH3KBP1	9606.ENSP00000482457	9606.ENSP00000380921	0	0	0	0.547	0	0.101	0.5	0.324	0.593
PNPO	PTS	9606.ENSP00000225573	9606.ENSP00000280362	0	0	0	0	0	0	0	0.448	0.448
POLE3	WDR48	9606.ENSP00000363286	9606.ENSP00000307491	0	0	0	0	0.057	0	0.65	0	0.656
POLR2M	SUPT5H	9606.ENSP00000299638	9606.ENSP00000470252	0	0	0	0	0	0	0	0.469	0.469
PRPF6	SNRPB2	9606.ENSP00000266079	9606.ENSP00000246071	0	0	0	0	0.119	0.954	0.9	0.169	0.996
PSIP1	SLC4A1AP	9606.ENSP00000370109	9606.ENSP00000479964	0	0	0	0	0	0	0	0.513	0.513
PURA	STX2	9606.ENSP00000332706	9606.ENSP00000376178	0	0	0	0	0	0	0	0.562	0.562
QSOX2	TSEN15	9606.ENSP00000351536	9606.ENSP00000355299	0	0	0	0	0	0	0	0.469	0.469
RASSF3	RFTN1	9606.ENSP00000443021	9606.ENSP00000334153	0	0	0	0	0	0	0	0.656	0.656
RASSF3	RASSF8	9606.ENSP00000443021	9606.ENSP00000384491	0	0	0	0	0.054	0	0	0.404	0.412
RASSF8	YAP1	9606.ENSP00000384491	9606.ENSP00000478927	0	0	0	0	0.14	0.22	0	0.565	0.684
RND3	YAP1	9606.ENSP00000364886	9606.ENSP00000478927	0	0	0	0	0.312	0.071	0	0.191	0.437
RNF169	RNF8	9606.ENSP00000299563	9606.ENSP00000362578	0	0	0	0	0	0	0	0.61	0.61
RNF40	SETDB1	9606.ENSP00000325677	9606.ENSP00000271640	0	0	0	0	0.101	0.155	0	0.313	0.433
RNF40	RNF8	9606.ENSP00000325677	9606.ENSP00000362578	0	0	0	0	0.063	0	0	0.516	0.527
RNF40	SUPT5H	9606.ENSP00000325677	9606.ENSP00000470252	0	0	0	0	0.163	0.162	0	0.384	0.53
RNF8	USP11	9606.ENSP00000362578	9606.ENSP00000218348	0	0	0	0	0.062	0	0	0.456	0.468
RPL30	TTC5	9606.ENSP00000428085	9606.ENSP00000258821	0	0	0	0	0	0.8	0	0	0.8
RPL30	STT3A	9606.ENSP00000428085	9606.ENSP00000376472	0	0	0	0	0	0.702	0	0	0.702
SAFB	SORBS3	9606.ENSP00000467423	9606.ENSP00000240123	0	0	0	0	0.079	0.075	0	0.731	0.75
SAFB	SCAF8	9606.ENSP00000467423	9606.ENSP00000413098	0	0	0	0	0.221	0	0	0.303	0.434
SBDS	TARBP2	9606.ENSP00000246868	9606.ENSP00000266987	0	0	0	0	0	0	0	0.489	0.489
SCAF8	SH3KBP1	9606.ENSP00000413098	9606.ENSP00000380921	0	0	0	0	0	0	0	0.512	0.512
SCAF8	SUPT5H	9606.ENSP00000413098	9606.ENSP00000470252	0	0	0	0	0.149	0.248	0	0.222	0.458
SENP3	TAF9	9606.ENSP00000314029	9606.ENSP00000370201	0	0	0	0	0.062	0.101	0.9	0.202	0.923
SETDB1	SUZ12	9606.ENSP00000271640	9606.ENSP00000316578	0	0	0	0	0.113	0.428	0	0.548	0.751
SGMS2	SGPL1	9606.ENSP00000378176	9606.ENSP00000362298	0	0	0	0	0	0	0	0.626	0.626
SH3KBP1	VPS37B	9606.ENSP00000380921	9606.ENSP00000267202	0	0	0	0	0	0.744	0	0.123	0.766
SH3KBP1	SHKBP1	9606.ENSP00000380921	9606.ENSP00000291842	0	0	0	0	0	0.675	0	0.374	0.788
SIVA1	ZBTB1	9606.ENSP00000329213	9606.ENSP00000451000	0	0	0	0	0	0	0	0.401	0.401
SLC4A1AP	ZC3H8	9606.ENSP00000479964	9606.ENSP00000386488	0	0	0	0	0.062	0	0	0.526	0.536
SLMO2	ZNHIT6	9606.ENSP00000348206	9606.ENSP00000359606	0	0	0	0	0.072	0	0	0.382	0.402
SNAPC1	ZC3H8	9606.ENSP00000216294	9606.ENSP00000386488	0	0	0	0	0.051	0	0	0.398	0.405
SNAPC1	TAF13	9606.ENSP00000216294	9606.ENSP00000355051	0	0	0	0	0.062	0	0.6	0	0.608
SNAPC1	SNAPC2	9606.ENSP00000216294	9606.ENSP00000221573	0	0	0	0	0	0.68	0.8	0.983	0.998
SNAPC1	SNAPC3	9606.ENSP00000216294	9606.ENSP00000370200	0	0	0	0	0.062	0.991	0.8	0.985	0.999
SNAPC2	ZC3H8	9606.ENSP00000221573	9606.ENSP00000386488	0	0	0	0	0	0	0	0.429	0.429
SNAPC2	TAF13	9606.ENSP00000221573	9606.ENSP00000355051	0	0	0	0	0	0	0.6	0	0.6
SNAPC2	SNAPC3	9606.ENSP00000221573	9606.ENSP00000370200	0	0	0	0	0	0.27	0.8	0.979	0.996
SNAPC3	TAF13	9606.ENSP00000370200	9606.ENSP00000355051	0	0	0	0	0	0	0.6	0.425	0.76
SUZ12	TBL1X	9606.ENSP00000316578	9606.ENSP00000217964	0	0	0	0	0.066	0	0.9	0.134	0.912
TAF13	TAF9	9606.ENSP00000355051	9606.ENSP00000370201	0	0	0	0	0.112	0	0.9	0	0.907
TAF9	ZNHIT6	9606.ENSP00000370201	9606.ENSP00000359606	0	0	0	0	0	0	0.72	0	0.72
TSEN15	VPS53	9606.ENSP00000355299	9606.ENSP00000401435	0	0	0	0	0	0	0	0.406	0.406
USP11	WDR48	9606.ENSP00000218348	9606.ENSP00000307491	0	0	0	0	0.131	0	0	0.524	0.568
USP38	WDR48	9606.ENSP00000303434	9606.ENSP00000307491	0	0	0	0	0.264	0.368	0	0.207	0.598
VPS39	VPS53	9606.ENSP00000335193	9606.ENSP00000401435	0	0	0	0	0.081	0	0	0.569	0.587
VPS53	WDR48	9606.ENSP00000401435	9606.ENSP00000307491	0	0	0	0	0.129	0	0	0.339	0.4
YAP1	YWHAE	9606.ENSP00000478927	9606.ENSP00000264335	0	0	0	0	0.061	0.783	0.6	0.161	0.922
